# Supplementary material for: Acute and 1‐Year Hospitalization Costs for Acute Myocardial Infarction Treated With Percutaneous Coronary Intervention: Results From the TRANSLATE‐ACS Registry
Source: PubMed Central journal article supplement — J Am Heart Assoc. 2019 Apr 12;8(8):e011322. doi: 10.1161/JAHA.118.011322 (PMC6507213; doi:10.1161/jaha.118.011322), 2019-04-12
Supplement: JAH3-8-e011322-s001.pdf [file JAH3-8-e011322-s001.pdf]

# **SUPPLEMENTAL MATERIAL**

## Appendix

### TRANSLATE ACS Investigators

The Treatment With Adenosine Diphosphate Receptor Inhibitors–Longitudinal Assessment of Treatment Patterns and Events After Acute Coronary Syndrome (TRANSLATE-ACS) investigators were A. Nasser Adjei, MD (Sparks Regional Medical Center), Agha Ahmed, MD (Galichia Heart Hospital, LLC), Bina Ahmed, MD (University of New Mexico Hospitals), Chowdhury Ahsan, MD (University Medical Center of Southern Nevada), Christopher Allen, MD (University of Pittsburgh Health System), Nishith Amin, MD (Arnot Ogden Medical Center), H. Vermon Anderson, MD (Memorial Hermann Hospital/University of Texas Health Science Center at Houston), Dominick Angiolillo, MD (Shands Jacksonville Medical Center/University of Florida), Mehrdad Ariani, MD (Northridge Hospital Medical Center), Imran Arif, MD (University of Cincinnati), Ghulam Awan, MD (University of South Alabama), Michael Azrin, MD (University of Connecticut Health Center), Richard Bach, MD (Washington University School of Medicine/Barnes-Jewish Hospital), Subhash Banerjee, MD (VA North Texas Health Care System), Kenneth Baran, MD (United Hospital), Stephen Battista, MD (Fairview Southdale Hospital), Hans Bauer, MD (Our Lady of Lourdes Medical Center), Anthony Bavry, MD (Malcom Randall VA Medical Center/North Florida/South Georgia Veterans Health System), Peter Berger, MD (Geisinger Wyoming Valley Medical Center), Charles Bethea, MD (INTEGRIS Baptist Medical Center, Inc), Jessica Birchem, MD (St John’s Hospital/St John’s Medical Research Institute, Inc), Richard Blankenbaker Jr, MD (Martin Memorial Medical Center), Paul Boffetti, MD (Lahey Cardiology/Southern New Hampshire Medical Center), Sorin Brener, MD (New York Methodist Hospital), David Brill, MD (Washington Adventist Hospital), Britta Brott, MD (University of Alabama at Birmingham Hospital), John Canto, MD (Lakeland Region Medical Center/Watson Clinic Center for Research, Inc), Charles Carey, MD (St Anthony’s Medical Center), Joel Carver, MD (Washington Regional Medical Center), Juan Chahin, MD (Westmoreland Regional Hospital), Jeffrey Chambers, MD (Metropolitan Cardiology Consultants at Mercy Hospital), Kollagunta Chandrasekhar, MD (Winter Haven Hospital), David Chang, MD (PinnacleHealth at Harrisburg Hospital), Michael Chang, MD (Mercy General Hospital), Adnan Chhatriwalla, MD (St Luke’s Hospital/Mid America Heart Institute), Pedro J. Colón Hernandez, MD (Transcatheter Medical Inc), Jeffrey Cook, MD (OSF Saint Anthony Medical Center/Rockford Cardiovascular Associates Research Foundation), Frank Corbally, MD (Lancaster General Hospital/Heart Specialists of Lancaster), William R. Craig, MD (St John’s Regional Medical Center/Mercy Health of Joplin), Linda Cuomo, MD (Westchester Medical Center/New York Medical College), Shukri David, MD (Providence Hospital), Michael Del Core, MD (The Cardiac Center of Creighton University Medical Center), Vishva Dev, MD (Los Robles Hospital & Medical Center), Lingareddy Devireddy, MD (St John Macomb Hospital), David Dobies, MD (Genesys Regional Medical Center), Sandhya Donepudi, MD (St Margaret Mercy Healthcare Centers), Joseph Doucette, MD (Overlake Hospital Medical Center), Anthony D’Souza, MD (Heart Specialists, PC of Southern Connecticut), Christopher Dyke, MD (Alaska Heart Institute), Melvin Echols, MD (Southeastern Regional Heart Center), Mehیار El Hamdani, MD (St Mary’s Medical Center), Bernard Erickson, MD (Saint Cloud Hospital/CentraCare Heart & Vascular

Center), John Erwin III, MD (Scott and White Hospital and Clinic), Steven Falen, MD (Sutter Roseville Medical Center), Bobbie Farber, MD (St Francis Hospital), Robert Feldman, MD (MediQuest Research Group Inc at Munroe Regional Medical Center), Ronald Fields, MD (St Mary Medical Center), Robert Fishberg, MD (Overlook Hospital), Daniel Fisher, MD (Umass Memorial Healthcare), Jean Foucauld, MD (Cardiology Partners Clinical Research Institute, LLC), Anthony Frey, MD (Atlantic Cardiology Associates/Peninsula Regional Medical Center), George Gabriel, MD (Allegheny General Hospital/Allegheny Singer Research Institute), Neal Gaither, MD (Winchester Medical Center), Kirk Garratt, MD (Lenox Hill Hospital), Matthew Gibb, MD (Carle Physicians Group/Carle Foundation Hospital), Lee Giorgi, MD (St Luke's Hospital Association of Duluth), Jeff Gladden, MD (Wise Regional Health System), Tyler Gluckman, MD (Providence St Vincent Medical Center), Rafael Gonzalez, MD (Scott and White Healthcare–Round Rock), Evelyne Goudreau, MD (Virginia Commonwealth University Medical Center), Bruce Graham, MD (Ball Memorial Hospital), Robert Greene, MD (Alta Bates Summit Medical Center), John Griffin, MD (Sentara Virginia Beach General Hospital/Cardiovascular Associates, Ltd), Paul Michael Grossman, MD (University of Michigan Healthcare System), Luis Gruberg, MD (Stony Brook University Medical Center), Darrel Gumm, MD (HeartCare Midwest/OSF Saint Francis Medical Center), Anjan Gupta, MD (Aurora St Luke's Medical Center), Paul Gurbel, MD (Sinai Hospital of Baltimore/Platelet Thrombosis Research), Jason Hall, MD (Medicor Cardiology), Franklin Handel, MD (Kettering Medical Center/Kettering Health Network), Steven Hearne, MD (Delmarva Heart Research Foundation, Inc/Peninsula Regional Medical Center), Timothy Henry, MD (Minneapolis Heart Institute/Abbott Northwestern Hospital), Stuart Higano, MD (Missouri Baptist Medical Center), Anthony Hilliard, MD (Loma Linda University Medical Center), David Hoffman, MD (St Elizabeth Hospital Medical Center/Humility of Mary Health Partners), Paula Hollingsworth, MD (Central Baptist Hospital), Naseem Jaffrani, MD (Rapides Regional Medical Center/Alexandria Cardiology Clinic/Cambridge Medical Trials), Richard Jantz, MD (Parker Adventist Hospital), Werner Jauch, MD (Pasco Cardiology Center), Alonzo Jones, MD (Columbus Cardiology Associates), Wesley Kai, MD (Hawaii Pacific Health Research Institute/Straub Hospital), Brian Kaminsky, MD (Bon Secours Virginia Health System), Steven Karas, MD (Holmes Regional Medical Center), Barbara Karenko, MD (Metro Health Hospital), Jason Katz, MD (University of North Carolina at Chapel Hill), Kenneth Kent, MD (Western Maryland Health System Regional Medical Center), Michael Kesselbrenner, MD (The Valley Hospital), Suhail Khadra, MD (John H. Stroger Jr Hospital), Akshay Khandelwal, MD (Henry Ford Hospital/Henry Ford Heart & Vascular Institute), Dennis Killian, MD (Provena Saint Joseph Medical Center), Sung Sup Kim, MD (Swedish Covenant Hospital), Joseph Klag, MD (Scottsdale Healthcare Osborn and Scottsdale Healthcare Shea), Bruce Klugherz, MD (Abington Memorial Hospital/Abington Medical Specialists), Mark Koenig, MD (Saint Thomas Hospital), Devendra Koganti, MD (Southern Heart Research Insititute, LLC/Southern Regional Medical Center), Richard Konstance, MD (Carilion Roanoke Memorial Hospital), Mark Kozak, MD (Penn State University College of Medicine Milton S. Hershey Medical Center), Phillip Kraft, MD (Beaumont-Troy/William Beaumont Hospital), George Kramer, MD (WellStar Health System/WellStar Kennestone Hospital/WellStar Cobb Hospital),

Rolf Kreutz, MD (Indiana University Health), Prasanna Kumar, MD (Memorial Hospital of Carbondale/Prairie Cardiovascular Consultants), Michael Kutcher, MD (Wake Forest University Baptist Medical Center/North Carolina Baptist Hospital), Gervasio Lamas, MD (Mount Sinai Medical Center), Charles Lambert, MD (University Community Hospital, Inc d/b/a Florida Hospital Tampa), Faisal Latif, MD (VA Medical Center, Oklahoma City), Joseph Lawton III, MD (Columbia Cardiology), Daniel Lee, MD (Bay Regional Medical Center), Kwan Lee, MD (University Physicians Healthcare Hospital/University of Arizona), Thomas LeGalley, MD (Marquette General Hospital/Upper Michigan Cardiovascular Associates, PC), Bernard Levi, MD (Menorah Medical Center/Midwest Cardiology Associates), Stephen Lewis, MD (Bethesda North Hospital/Hatton Institute for Research and Education), Mark Lurie, MD (Torrance Memorial Medical Center), Hugh MacIsaac, MD (St Elizabeth Medical Center), William Mackin, MD (Delnor Community Hospital), Calin Maniu, MD (Bon Secours Virginia Health System), Stephen Marshalko, MD (Bridgeport Hospital), Robert Marshall, MD (Meritus Medical Center), Scott Martin, MD (Covenant Medical Center), Marco Mazzella, MD (Kansas City Heart Foundation/St Joseph Medical Center), Raymond McKay, MD (Hartford Hospital), Ronald McKechnie, MD (Cardiovascular Associates Ltd/Chesapeake Regional Medical Center), Bruce McLellan, MD (St Charles Health System), John Messenger, MD (University of Colorado Denver), Paul Micale, MD (Riverside Hospital, Inc d/b/a Riverside Regional Medical Center), Jay Midwall, MD (Palm Beach Heart Research Institute, LLC at JFK Medical Center, Indian River Medical Center), Gary Miller, MD (Danville Regional Medical Center/Cardiology Consultants of Danville, Inc), Michael Montgomery, MD (North Kansas City Hospital), Mehesh Mulumudi, MD (Providence Regional Medical Center), Venkatesh Nadar, MD (Heritage Cardiology Associates/Holy Spirit Health System), Arthur Nazarian, MD (St Alexius Medical Center), Georges Nseir, MD (Chandler Regional Medical Center), Georges Nseir, MD (Mercy Gilbert Medical Center), Brian O'Murchu, MD (Temple University Hospital), John Ord, MD (Aurora Denver Cardiology Associates, PC), Martin O'Riordan, MD (Mercy Fitzgerald Hospital), Thomas Palmer, MD (Waukesha Memorial Hospital/ProHealth Care, Oconomowoc Memorial Hospital/ProHealth Care), John Paulowski, MD (Aultman Health Foundation), William Phillips, MD (Central Maine Medical Center), Richard Pish, MD (Pish Medical Associates), Thomas Pow, MD (Lakeland Hospital/Great Lakes Heart and Vascular Institute), Eric Powers, MD (Medical University of South Carolina), Antonis Pratsos, MD (Bryn Mawr Hospital), Peter Puleo, MD (St Luke's Hospital and Health Network), Joshua Purow, MD (Jim Moran Heart and Vascular Research Institute, Holy Cross Hospital Inc), Edward Rachofsky, MD (Cardiology Associates of Somerset County, PA), Michael Ragosta, MD (University of Virginia Health System), Ganesh Raveendran, MD (University of Minnesota), Arthur Riba, MD (Oakwood Hospital & Medical Center, Dearborn), Wilfredo Rivera, MD (McLaren Regional Medical Center-Research Institute), David Roberts, MD (Sutter Heart and Vascular Institute), Roy Robertson, MD (Parkview Hospital, Inc), Scott Robertson, MD (Sentara Norfolk General Hospital), Arsenio Rodriguez, MD (Florida Hospital), Rolando Rodriguez, MD (Bay Area Cardiology Associates, PA), Michael Romanelli, MD (St John Hospital & Medical Center), Chanwit Roongsritong, MD (Renown Regional Medical Center), Eli Rosenthal, MD (Legacy Health), David Roth, MD

(Kalispell Regional Medical Center, Inc d/b/a Glacier View Cardiology), Ahmed Sabe, MD (Mercy Medical Center), David Scherer, MD (Baylor Regional Medical Center at Grapevine/Baylor Research Institute), Jay Schlaifer, MD (St Elizabeth East), Gopi Shah, MD (Palmetto Health), Nicolas Shammas, MD (Midwest Cardiovascular Research Foundation), Fayez Shamoon, MD (Saint Michael's Medical Center), Emanuel Shaoulian, MD (Hoag Memorial Hospital Presbyterian/Pacific Coast Cardiology), Trilok Sharma, MD (Southwest General Health Center), Thomas Shimshak, MD (Wheaton Franciscan Healthcare–All Saints, Inc), Arsalan Shirwany, MD (Baptist Memorial Hospital/Stern Cardiovascular Foundation, Inc), Paul Silverman, MD (Advocate Christ Medical Center), William Smith, MD (New Hanover Regional Medical Center), Dane Sobek, MD (Bozeman Deaconess Hospital), Ali Sonel, MD (VA Pittsburgh Healthcare System), Anthony Sonn, MD (Mercy Hospitals East Communities d/b/a Mercy Hospital St Louis), Nattapong Sricharoen, MD (University of Nebraska Medical Center), Nicholas Stamato, MD (UHS–United Health Services), Dwight Stapleton, MD (Donald Guthrie Foundation for Education and Research/Robert Packer Hospital), Robert Stenberg, MD (Conemaugh Valley Memorial Hospital d/b/a Memorial Medical Center), Brett Stoll, MD (AnMed Health), Damodhar Suresh, MD (St Elizabeth Medical Center/St Elizabeth's Physicians Heart and Vascular Group), Peter Tadros, MD (University of Kansas Medical Center), Praveen Tamirisa, MD (The Toledo Hospital), Hoang Thai, MD (Southern Arizona VA Health Care System), Barry Uretsky, MD (Central Arkansas Veterans' Healthcare System), Tudor Vagaonescu, MD (Cardiovascular Institute/Robert Wood Johnson Medical School), Imran Virk, MD (INTEGRIS Cardiology Southwest/INTEGRIS Southwest Medical Center), Kishor Vora, MD (Research Integrity, LLC), Ron Waksman, MD (Washington Hospital Center), Harry Wallner, MD (Trinity Medical Center), Jonathan Waltman, MD (Saint Joseph Hospital), Tracy Wang, MD (Duke University), Hal Wasserman, MD (Danbury Hospital), Richard Waters, MD (St Joseph's Medical Center), Thomas Watson, MD (Santa Barbara Cottage Hospital), Larry Weathers, MD (Mercy Medical Center Northwest Arkansas), Richard Webel, MD (University of Missouri Health System), Bradley Weinberg, MD (Indiana Heart Hospital), Barry Weinstock, MD (Orlando Health, Inc), Sandra Weiss, MD (Christiana Care Health Services), James Welker, MD (Anne Arundel Medical Center), Donald Westerhausen Jr, MD (Elkhart General Hospital), James Wilson, MD (St Luke's Episcopal Hospital), William Witmer, MD (Aurora BayCare Medical Center), Christopher Wolfram, MD (Bellin Memorial Hospital, Inc d/b/a Cardiology Associates of Bellin Health), Lambert Wu, MD (Cotton-O'Neil Clinical Research Center/Stormont-Vail), Mark Zainea, MD (McLaren Medical Center–Macomb), Patrik Zetterlund, MD (Salinas Valley Memorial Healthcare System), and James Zidar, MD (Rex Hospital).
